# Supplementary material for: Targeted intracellular delivery of Cas13 and Cas9 nucleases using bacterial toxin-based platforms
Source: PubMed Central journal article supplement — Cell Rep. Author manuscript; Available in PMC 2022 Mar 28. (PMC8958846; doi:10.1016/j.celrep.2022.110476), 2022-03-08
Supplement: NIHMS1787423-supplement-1.pdf [file NIHMS1787423-supplement-1.pdf]

**Cell Reports, Volume 38**

**Supplemental information**

**Targeted intracellular delivery  
of Cas13 and Cas9 nucleases using  
bacterial toxin-based platforms**

**Songhai Tian, Yang Liu, Evan Appleton, Huan Wang, George M. Church, and Min Dong**

**Supplementary Information**

**Supplementary Figures S1 – S6**

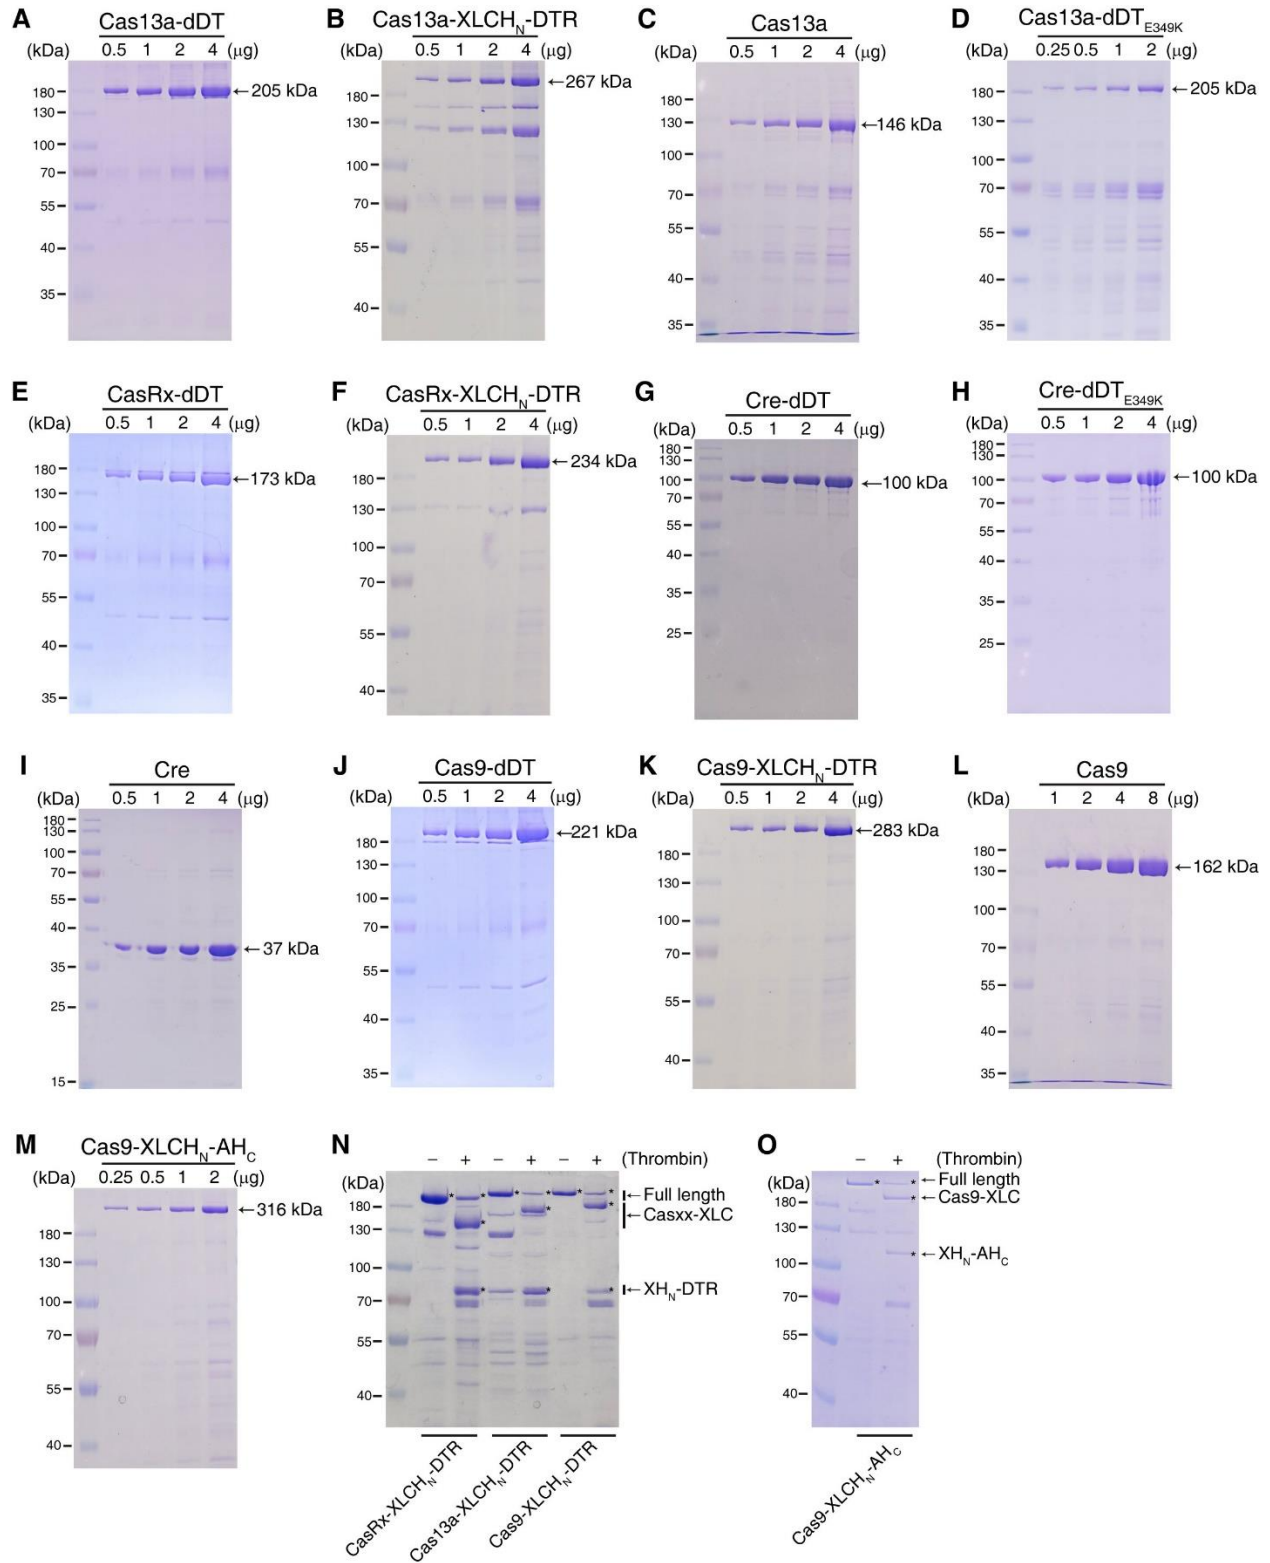

**Figure S1. Protein purification and activation. Related to Figure 1-6.**

(**A-M**) Recombinant Cas13a-dDT (**A**), Cas13a-XLCH<sub>N</sub>-DTR (**B**), Cas13a (**C**), Cas13a-dDT<sub>E349K</sub> (**D**), CasRx-dDT (**E**), CasRx-XLCH<sub>N</sub>-DTR (**F**), Cre-dDT (**G**), Cre-dDT<sub>E349K</sub> (**H**), Cre (**I**), Cas9-dDT (**J**), Cas9-XLCH<sub>N</sub>-DTR (**K**), Cas9 (**L**), and Cas9-XLCH<sub>N</sub>-AH<sub>C</sub> (**M**) were purified as His6-tagged proteins. SDS-PAGE was used to confirm the purity. The molecular weights of all full-length protein were marked.

(**N-O**) Activation of Cas13a-XLCH<sub>N</sub>-DTR (**N**), CasRx-XLCH<sub>N</sub>-DTR (**N**), Cas9-XLCH<sub>N</sub>-DTR (**N**), and Cas9-XLCH<sub>N</sub>-AH<sub>C</sub> (**O**). The purified proteins were mixed with thrombin and incubated at 4 °C overnight. SDS-PAGE was run under reduction conditions (with DTT). The bands for full-length proteins and cleaved fragments were marked. Around 80~90% full-length proteins were activated.

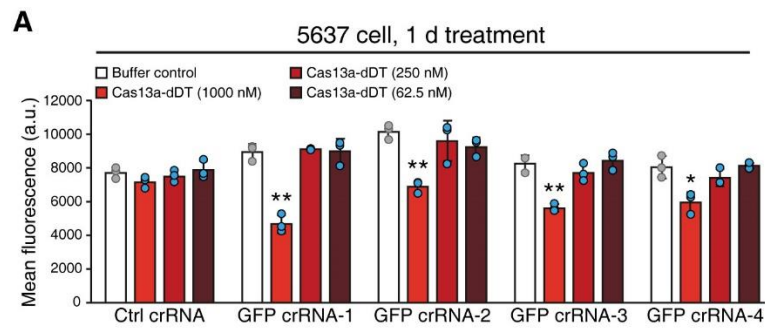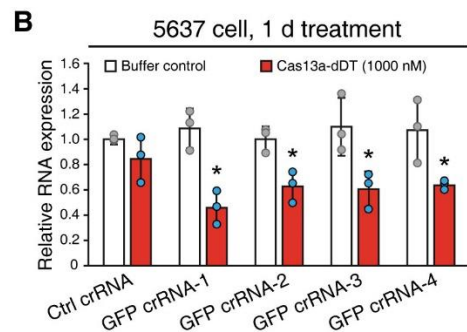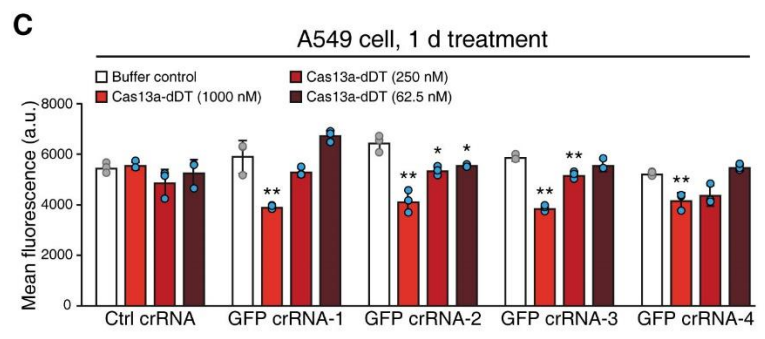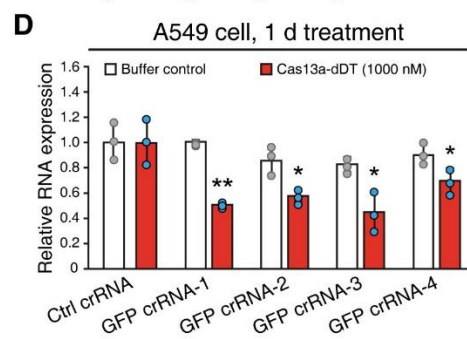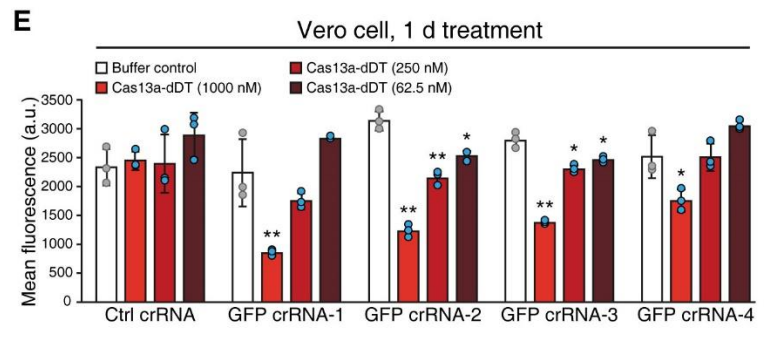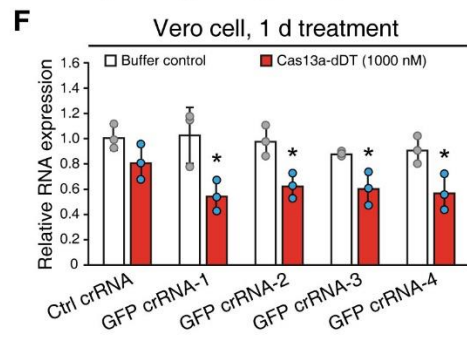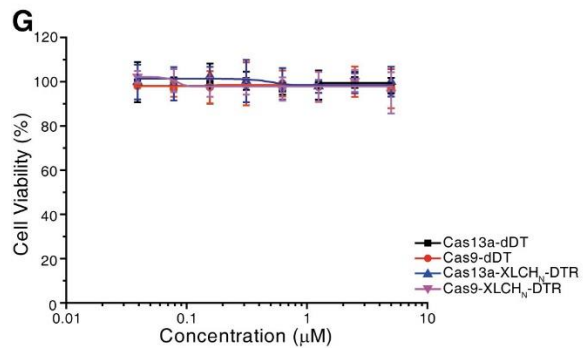

**Figure S2. Cas13a-dDT is validated on multiple cell lines. Related to Figure 1-2.**

(A-F) GFP expressing human 5637 (A-B), human A549 (C-D), or green monkey Vero (E-F) cells were transfected with control (Ctrl) or GFP-targeting crRNAs and treated with different concentration of Cas13a-dDT for 24 hours. The protein level of GFP was measured by flow cytometry and quantified by MFI (A, C, E), the mRNA level of GFP was analyzed by qRT-PCR (B, D, F). Error bars indicate mean  $\pm$  SD;  $N = 3$  (biological replicates); \*,  $p < 0.05$ ; \*\*,  $p < 0.01$  (Student's  $t$ -test).

(G) HeLa cells were exposed to a series of concentrations of the indicated proteins for 2 days and cell viability was measured using MTT assays. Error bars indicate mean  $\pm$  SD,  $N = 3$  (biological replicates).

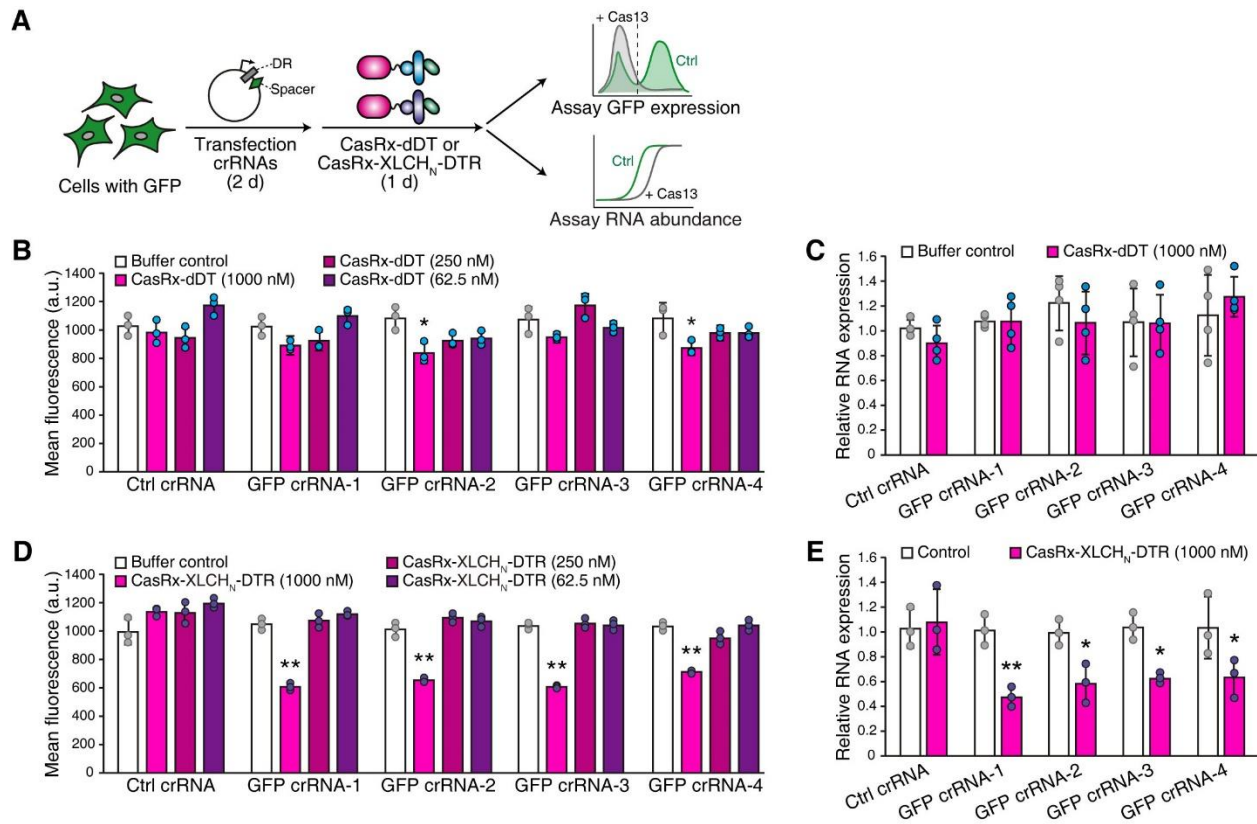

**Figure S3. CasRx can be delivered using DT-based and BoNT/X-based systems. Related to Figure 1-2.**

(A) Schematic of the CasRx delivery experiment. HeLa+GFP cells were transfected with Ctrl or GFP-targeting crRNAs for 48 hours, followed by treatment with different concentrations of CasRx-dDT or activated CasRx-XLCH<sub>N</sub>-DTR for 24 hours. GFP expression at the protein level and the mRNA level were analyzed by flow cytometry and qRT-PCR, respectively. DR, direct repeat.

(B-E) Quantification of GFP expression. HeLa+GFP cells were transfected with Ctrl or GFP-targeting crRNAs and treated with different concentrations of CasRx-dDT (B-C) or activated CasRx-XLCH<sub>N</sub>-DTR (D-E) for 24 hours. GFP protein was measured by flow cytometry and quantified by MFI (B, D), and GFP mRNA was analyzed by qRT-PCR (C, E). CasRx cannot be delivered by DT system but can be delivered BoNT/X system at 1  $\mu$ M concentration. Error bars indicate mean  $\pm$  SD;  $N = 3$  (biological replicates); \*,  $p < 0.05$ ; \*\*,  $p < 0.01$  (Student's  $t$ -test).

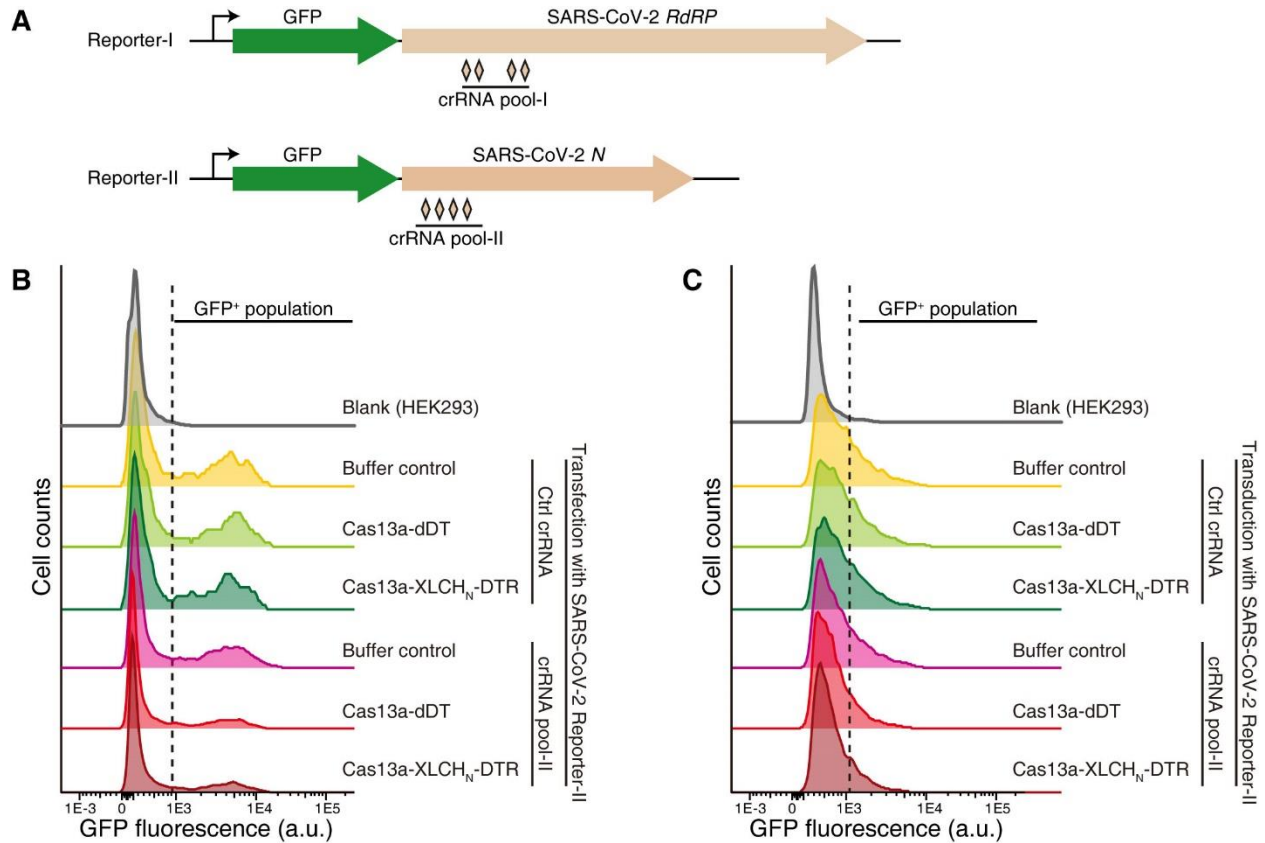

**Figure S4. Cas13a inhibits SARS-CoV-2 reporters. Related to Figure 4.**

(A) Schematic of the SARS-CoV-2 reporters. Reporters were built by fusing GFP with SARS-CoV-2 fragments, RNA-dependent RNA polymerase (*RdRP*) for Reporter-I and Nucleocapsid (*N*) for Reporter-II, respectively. For each fragment, four crRNAs were designed to target different regions and mixed to produce crRNA pool-I and pool-II.

(B-C) Representative flow cytometry histograms for SARS-CoV-2 reporter-II, which were over-expressed in HEK293 cells by transient transfection (B) or lentiviral transduction (C). Cells were transfected with crRNAs, followed by treatment with 1  $\mu$ M Cas13a-dDT or activated Cas13a-XLCH<sub>N</sub>-DTR. The GFP<sup>+</sup> population was significantly reduced when co-treatment with crRNA pools and Cas13 proteins. Representative histograms from one of three independent experiments are shown.



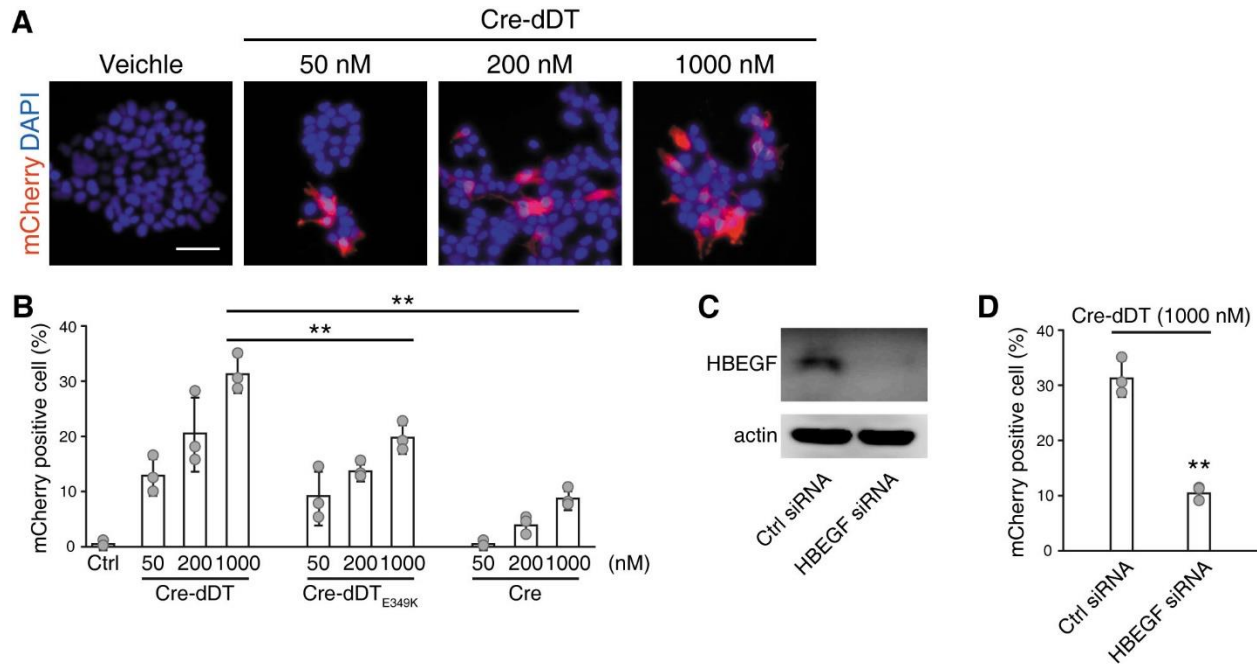

**Figure S5. Delivery of Cre recombinase into cells. Related to Figure 5.**

(A) Cre reporter cells (HEK293 stably expressing reporter; Cre-mediated DNA recombination can turn on mCherry expression) treated with 50, 200, or 1000 nM Cre-dDT for 48 h. The mCherry signal was analyzed under fluorescence microscope. The representative images were from one of three independent experiments. Nuclei were labeled with DAPI. Scale bar, 25  $\mu$ m.

(B) The percentage of mCherry positive cells was shown as a bar-chart. Cre-dDT<sub>E349K</sub> and Cre were analyzed in parallel. Error bars indicate mean  $\pm$  SD;  $N = 3$  (biological replicates); \*\*,  $p < 0.01$  (Student's  $t$ -test).

(C-D) Delivery of Cre-dDT is dependent on HBEGF receptor. The HBEGF-targeting or non-targeting control siRNAs were transfected into reporter cells and cell lysates were analyzed by immunoblot detecting HBEGF and actin (C). Cells were then treated with Cre-dDT (1  $\mu$ M) for 48 h. The percentage of mCherry-positive cells shown as a bar-chart (D). Error bars indicate mean  $\pm$  SD;  $N = 3$  (biological replicates); \*\*,  $p < 0.01$  (Student's  $t$ -test).

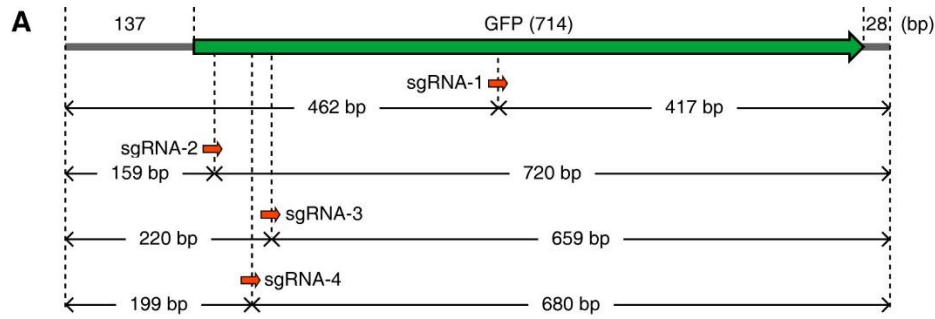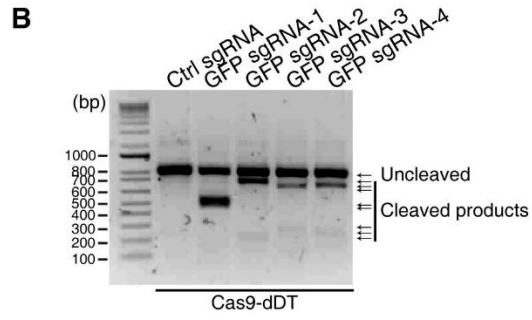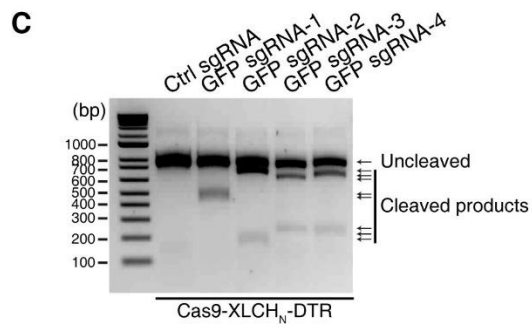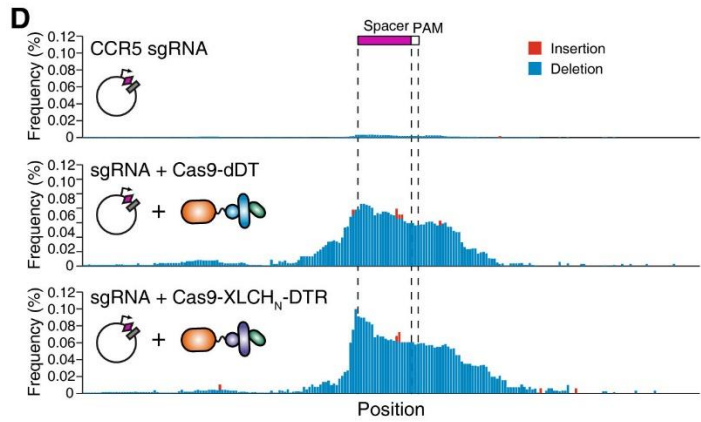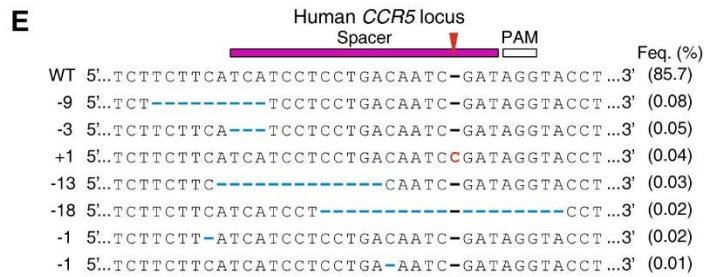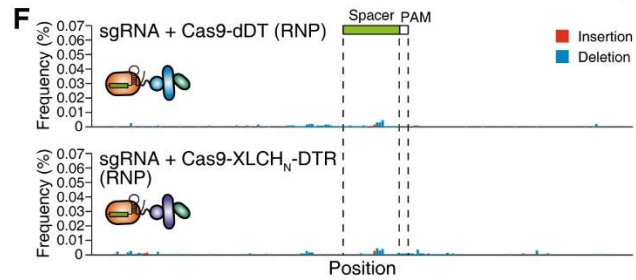

**Figure S6. Cas9, but not Cas9 RNP, can be delivered into cells using DT-based and BoNT/X-based systems. Related to Figure 5-6.**

(A) Schematic of the substrate and sgRNAs. A DNA substrate (contains GFP gene) and four well-established GFP-targeting sgRNAs were produced. The expected size of substrate and cleaved products are shown. bp, base pair.

(B-C) In vitro cleavage assay. 250 ng purified Cas9-dDT (B) or Cas9-XLCH<sub>N</sub>-DTR (C) were pre-mixed with 50 ng sgRNA at room temperature for 5 min to form RNP. 400 ng DNA substrate was added to the RNP and the mixture was incubated at 37 °C for 1 h. Agarose gel (1%) electrophoresis was used to analyze the cleaved products. Representative gel images from one of three independent experiments are shown.

(D) Genome editing for *CCR5* locus. HEK293 cells were transfected with *CCR5*-targeting sgRNA and treated with 1 μM Cas9-dDT or activated Cas9-XLCH<sub>N</sub>-DTR. The amplicon sequence of the sgRNA targeting region was plotted on the x-axis, and the frequency of insertion (red) and deletion (blue) at individual position were plotted on the y-axis. The position of spacer and PAM (protospacer adjacent motif) were marked. Representative histograms from one of three independent experiments are shown.

(E) Representative genotypes of Cas9-dDT edited human *CCR5* locus in HEK293 cells. The -9 bp mutation is the most frequent genotype.

(F) Cas9 RNP cannot be delivered. RNP was generated by mixing protein and sgRNA (5:1, w/w) at room temperature for 5 min. HeLa cells were treated with 1 μM RNP for two days. No significant InDel peaks can be identified. Representative histograms from one of three independent experiments are shown.
